# Supplementary material
Source: publisher site journal article supplement (https://www.spandidos-publications.com/8597/downloadSupplementary)

Figure S1. Patterns of LOH analysis. The numbers 1-12 each represent a probe used for hybridization. The left track contained the B sample, which served as a control, and in the right track for each probe the T samples are shown for comparison. The probes used in each numbered track were as follows: 1, D1S 1608; 2, AT-rich interaction domain 1A; 3, D1S 1161; 4, D1S 1184; 5, D14S 81; 6, D14S DPF3; 7, D14S 1018; 8, D14S 70; 9, D22S 445; 10, D22S 684; 11, D22S 268; 12, D22S 258. (A) Sample T9177: In tracks 1, 2, 9 and 10, double bands, outlined in red, indicated homozygosity in these probes. Track 8 showed an ambiguous band pattern. Overall, there was no LOH present. (B) Sample T9181: In track 1, a double band, outlined in red, indicated homozygosity, thus not allowing any conclusions to be drawn regarding LOH concerning this probe. Again, track 8 showed an ambiguous band pattern. In tracks 5-7, two bands were found, indicating that there was no LOH concerning chromosome 14. A weakening of a band in the T track compared with the B track was observed in tracks 2-4 and 9-11. It could be inferred that for both chromosome 1 and chromosome 22, LOH seemed to be present in the T samples. B, blood; T, tumor; LOH, loss of heterozygosity.

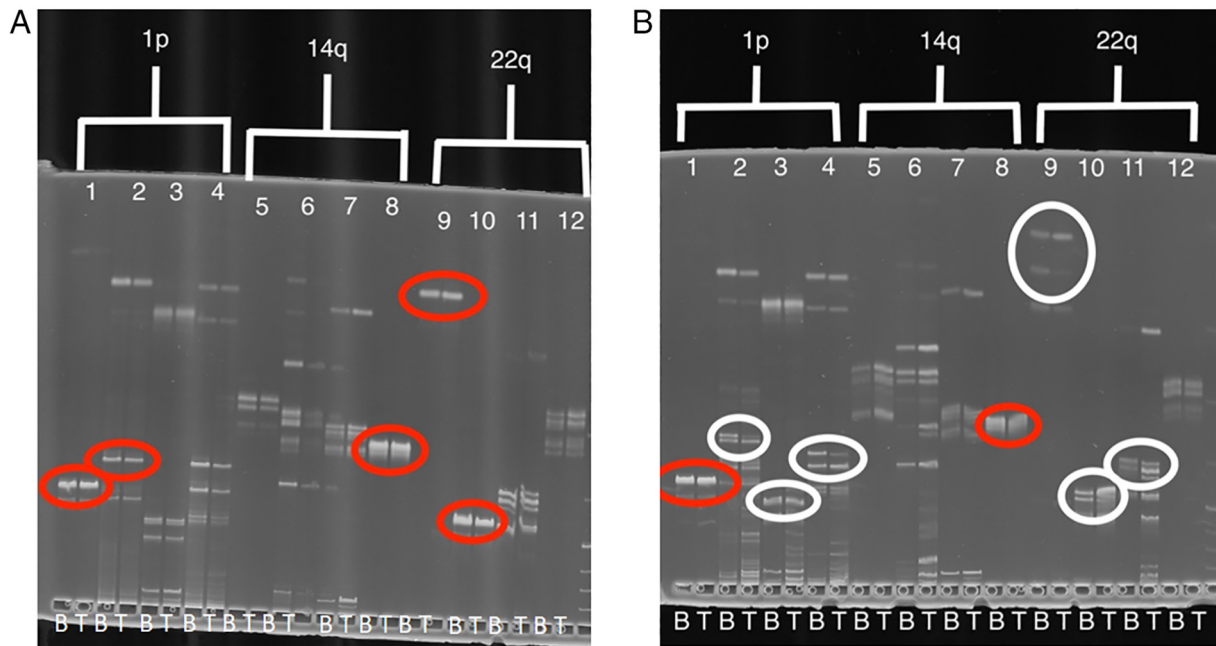

Supplement: Supplementary file 1 [file downloadSupplementary]
